# Supplementary material
Source: PubMed Central journal article supplement (PMC4734573)
Supplement: supp_pp.15.01620_PP2015-01620DR1_Supplemental_figures.pdf [file supp_pp.15.01620_PP2015-01620DR1_Supplemental_figures.pdf]

**Supplemental Figure 1.** Missense mutations in *SICUS1* (gene model: SLSBM\_L54139\_01; [http://www.kazusa.or.jp/tomato\\_sbm/cgi-bin/genemodel.cgi](http://www.kazusa.or.jp/tomato_sbm/cgi-bin/genemodel.cgi)) detected by TILLING (Targeting Induced Local Lesions IN Genomes) in 6912 M2 families of an EMS -mutagenized Micro-Tom tomato population (Just *et al.*, 2013).

**A, Position of the mutations in *SICUS1* and predicted effect.** SIFT ( <http://sift.jcvi.org/>) predicts whether an amino acid substitution affects protein function.

| M2 family     | Mutation nt (ATG) | Mutation aa (ATG) | Mutation | SIFT prediction                |
|---------------|-------------------|-------------------|----------|--------------------------------|
| <i>cus1-b</i> | G1955T            | R229L             | Missense | TOLERATED with a score of 0.53 |
| <i>cus1-c</i> | G2059A            | D264N             | Missense | TOLERATED with a score of 0.57 |

**B, Graphic representation of mutations identified in *SICUS1*** obtained with PARS ESNP program (Taylor and Greene, 2003). Black triangles represent the two missense mutations .

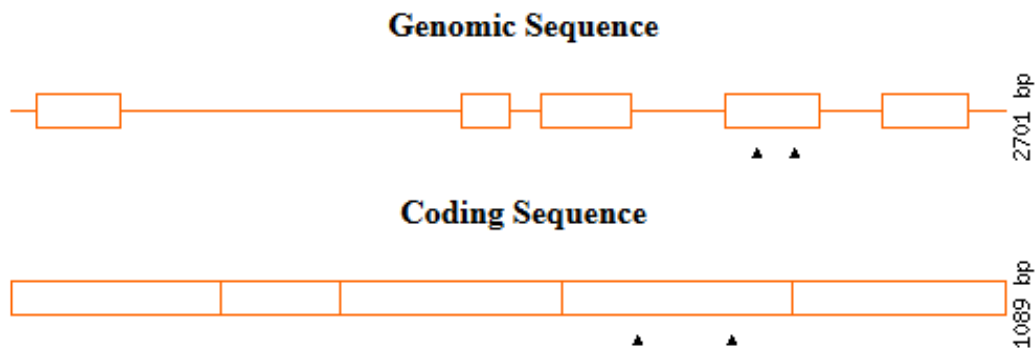

**Supplemental Figure 1.** Missense mutations in *SICUS1* (gene model: SLSBM\_L54139\_01; [http://www.kazusa.or.jp/tomato\\_sbm/cgi-bin/genemodel.cgi](http://www.kazusa.or.jp/tomato_sbm/cgi-bin/genemodel.cgi)) detected by TILLING (Targeting Induced Local Lesions IN Genomes) in 6912 M2 families of an EMS-mutagenized Micro-Tom tomato population (Just *et al.*, 2013). A, Position of the mutations in *SICUS1* and predicted effect. SIFT (<http://sift.jcvi.org/>) predicts whether an amino acid substitution affects protein function. B, Graphic representation of mutations identified in *SICUS1* obtained with PARSESNP program (Taylor and Greene, 2003). Black triangles represent the two missense mutations.

A

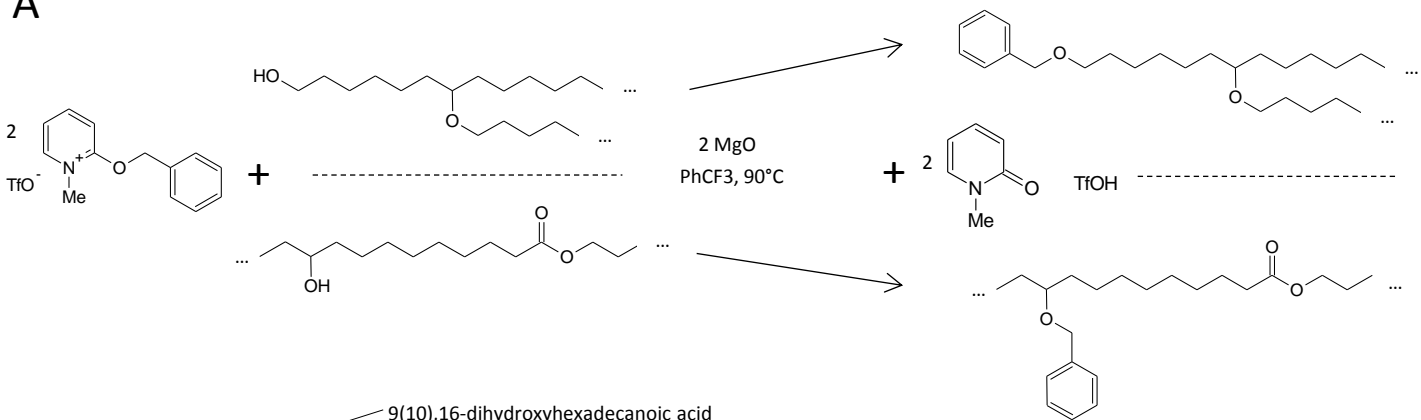

B

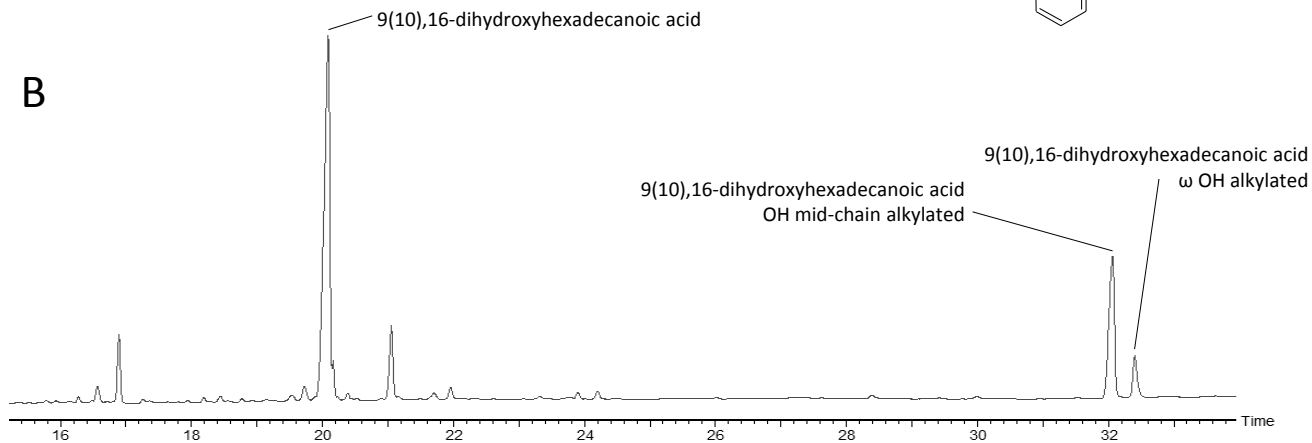

C

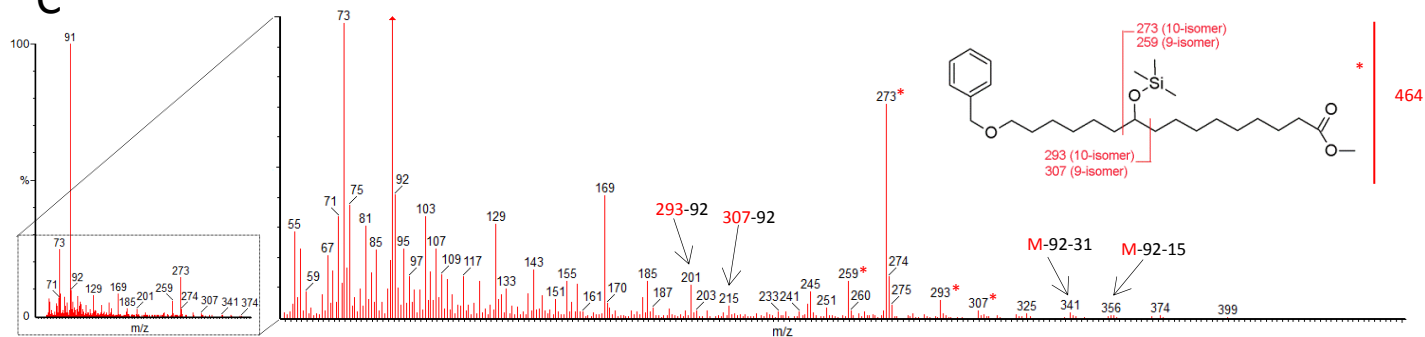

D

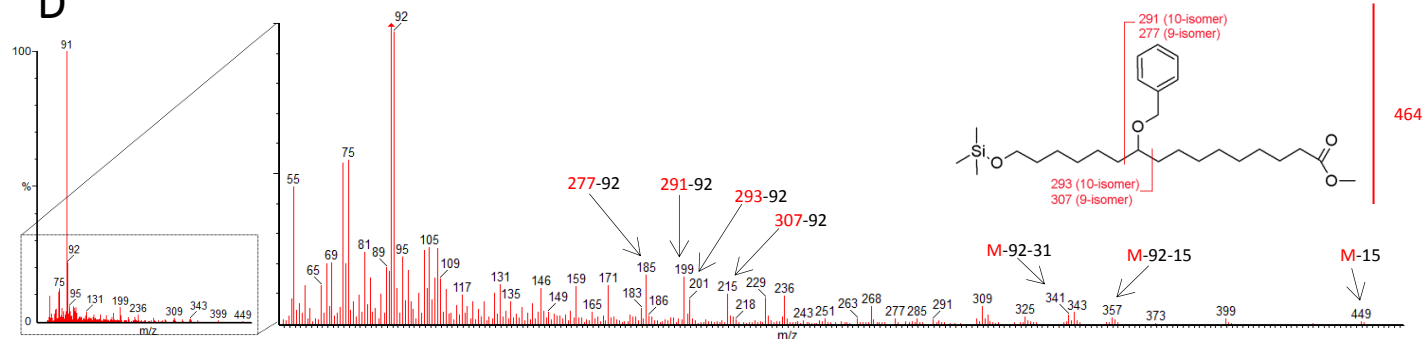

### Supplemental Figure 2. Benzyl etherification of non esterified cutin monomers.

A, Reaction scheme with primary or secondary OH groups of 9(10)16-dihydroxyhexadecanoic acid . B and E, GC-Chromatogram; C,D,F and G, mass spectra of O-alkylated and silylated derivatized cutin monomers (TMS). C, ω-O-alkylated-dihydroxyhexadecanoic acid. D, mid-chain O-alkylated-dihydroxyhexadecanoic acid. F, glycerol alkylated in *sn*-1/3 position . G, glycerol alkylated in *sn*-2 position .

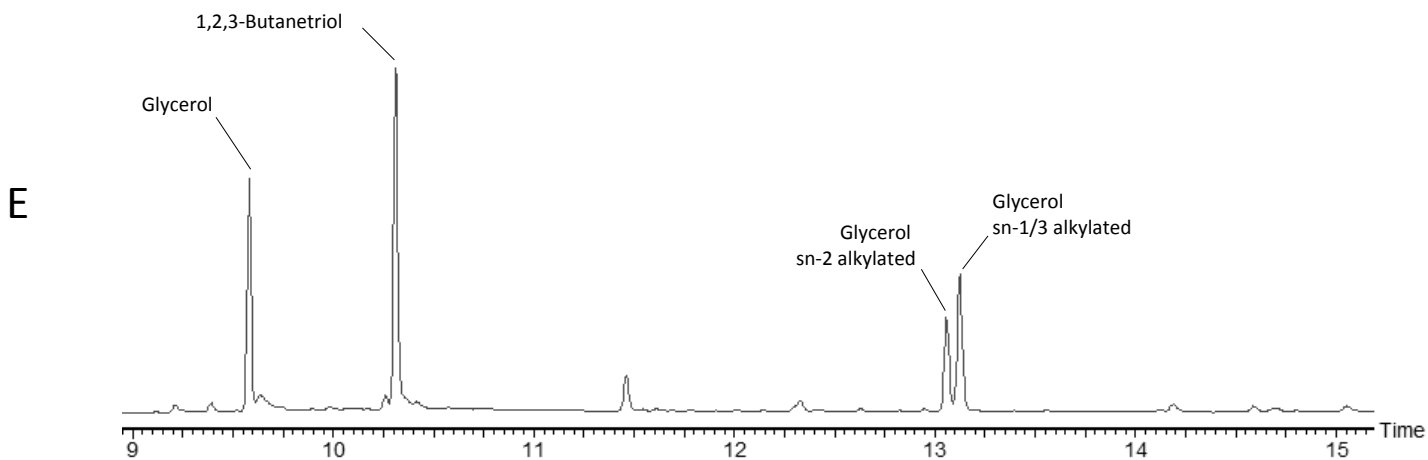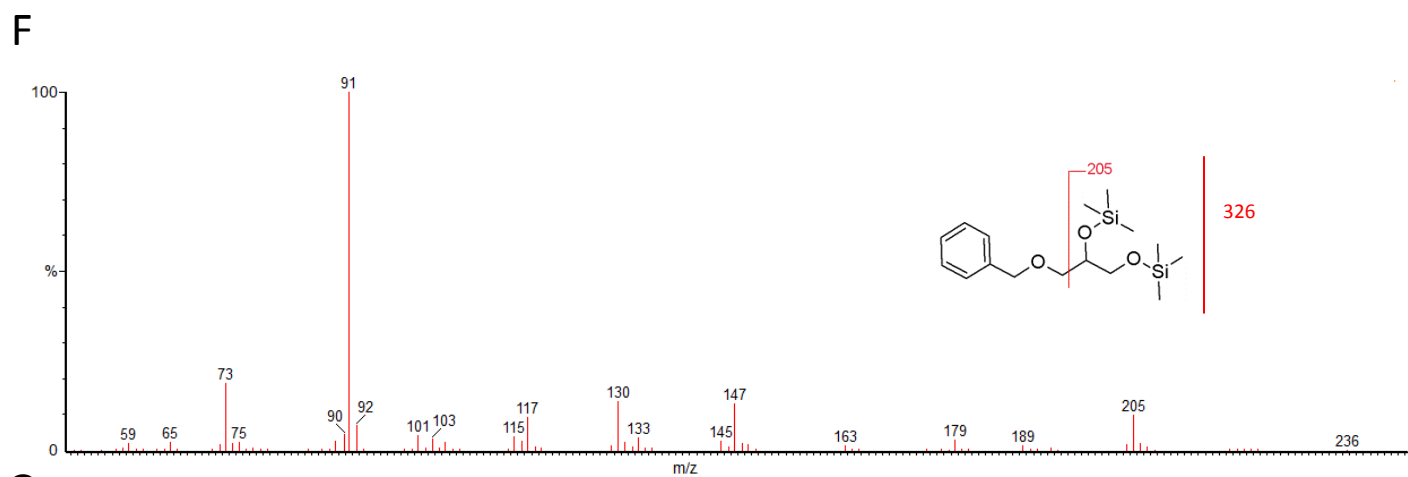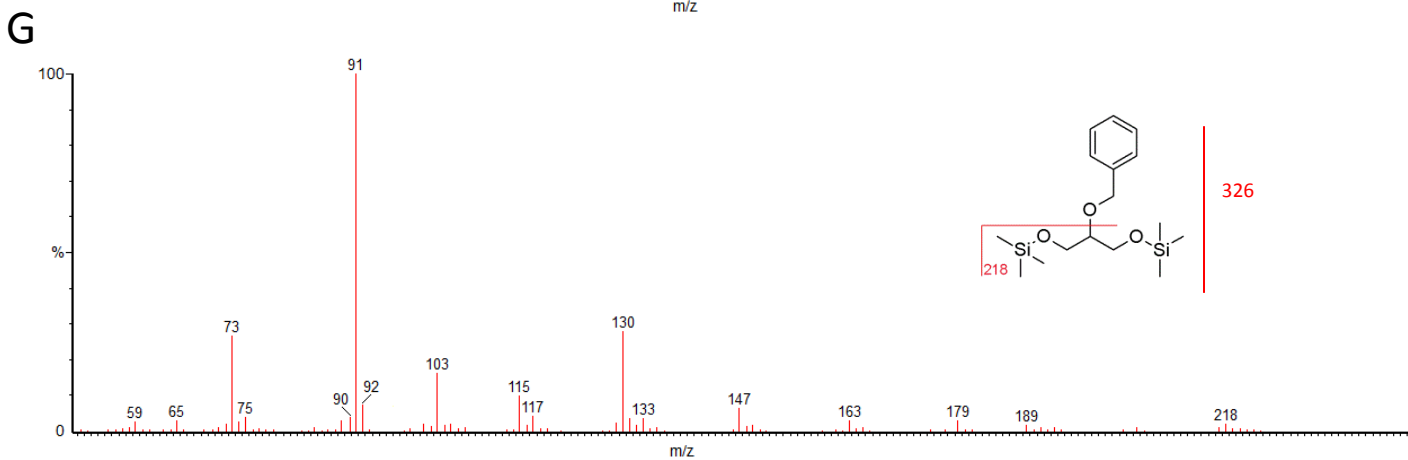

**Supplemental Figure 2 (continue). Benzyl etherification of non esterified cutin monomers.**

A, Reaction scheme with primary or secondary OH groups of 9(10)16-dihydroxyhexadecanoic acid . B and E, GC-Chromatogram; C,D,F and G, mass spectra of O-alkylated and silylated derivatized cutin monomers (TMS). C,  $\omega$ -O-alkylated-dihydroxyhexadecanoic acid. D, mid-chain O-alkylated-dihydroxyhexadecanoic acid. F, glycerol alkylated in *sn*-1/3 position . G, glycerol alkylated in *sn*-2 position .

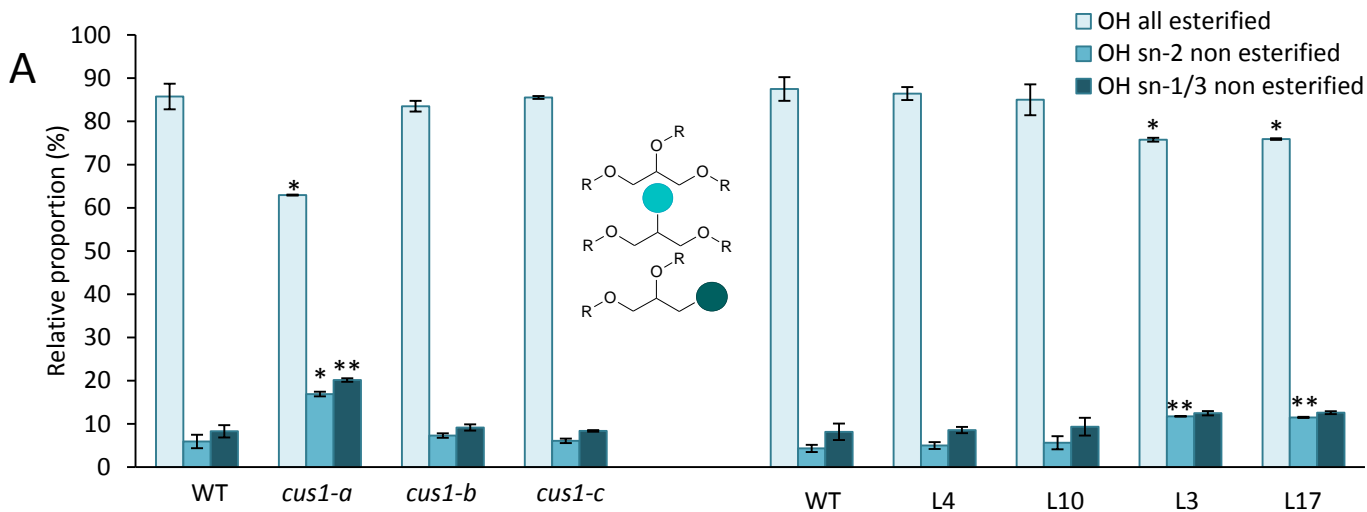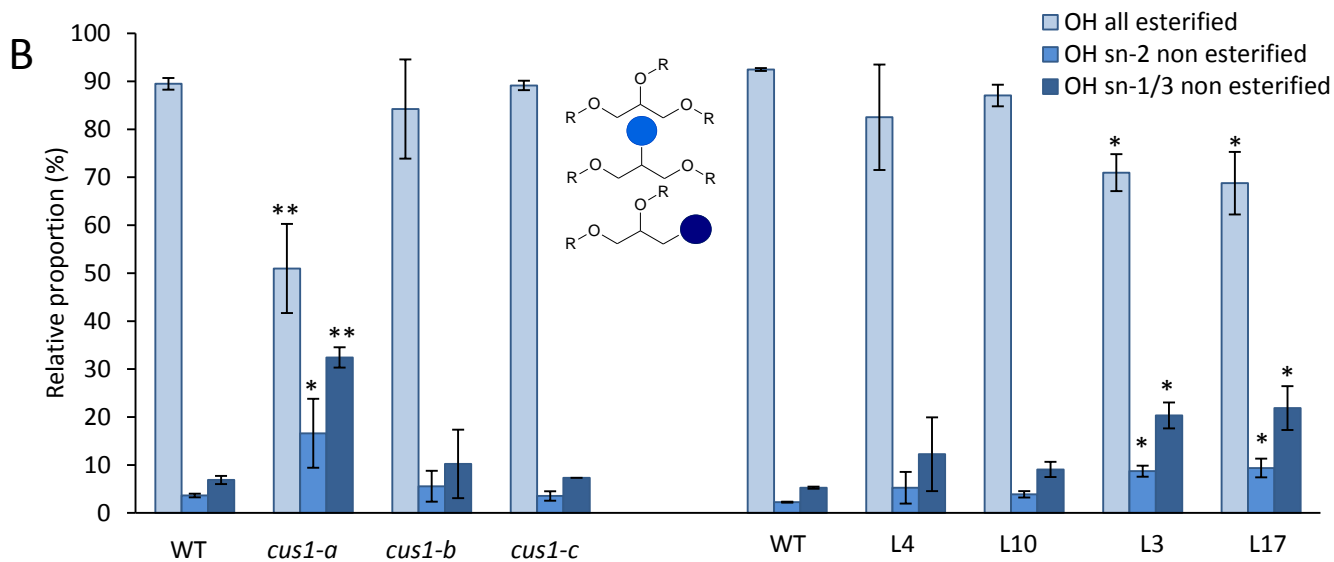

**Supplemental Figure 3. Esterification levels of glycerol OH groups of tomato fruit cutin isolated from *cus1* mutants and *Pro35S:SiCUS1<sup>RNAi</sup>* lines.**

A, 20 Days Post Anthesis (DPA) fruits. B, red ripe (RR) fruits. Left panel, *cus1* mutants. Right panel, *Pro35S:SiCUS1<sup>RNAi</sup>* lines. WT, wild type. Mean values ( $\pm$  S.D.) are calculated from 9 independent measurements (3 fruits, 3 technical replicates each). Significant differences from the corresponding WT are indicated by asterisks (t-test; \*,  $P < 0.05$ ; \*\*,  $P < 0.01$ ).

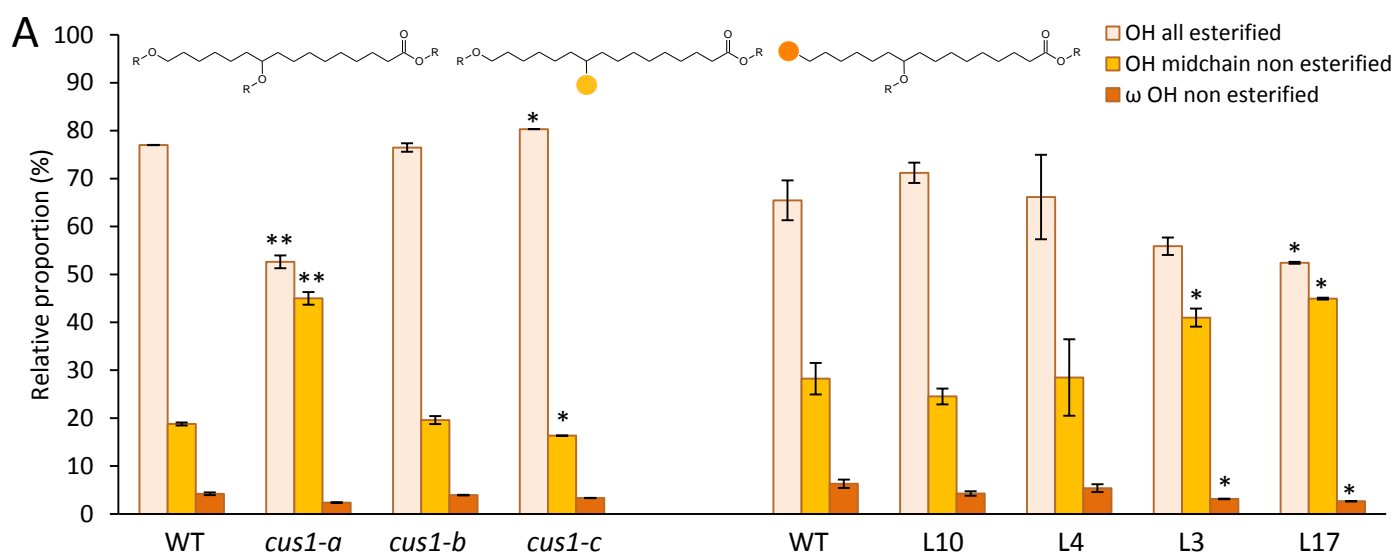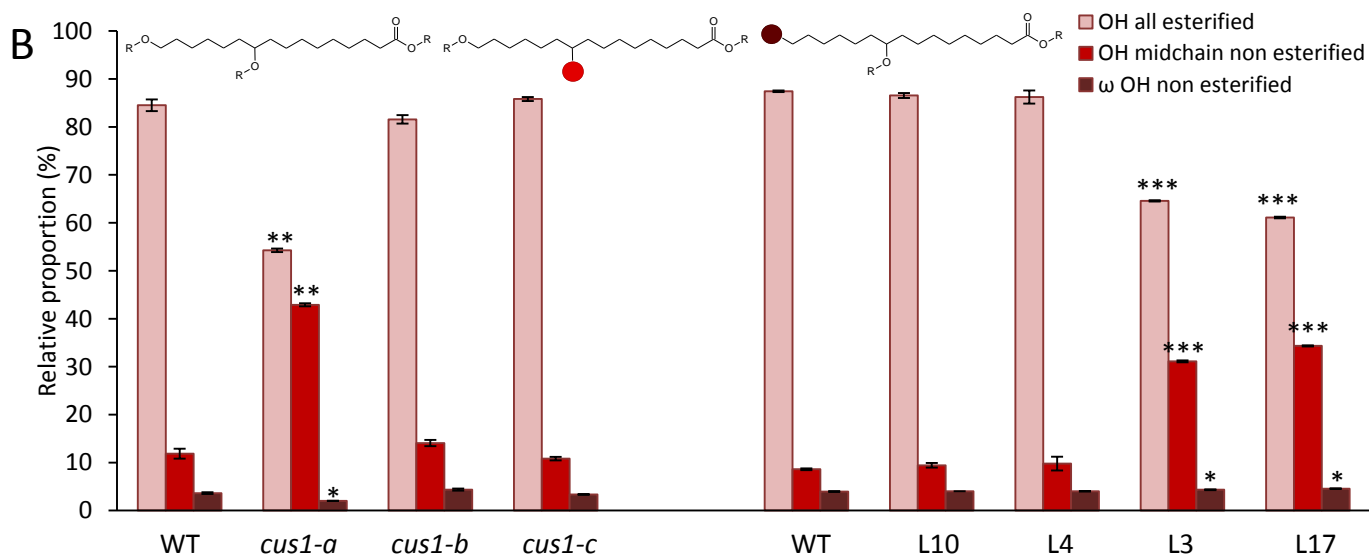

**Supplemental Figure 4. Esterification levels of 9(10),16-dihydroxyhexadecanoic acid OH groups of tomato fruit cutin from *cus1* mutants and *Pro35S:SICUS1<sup>RNAi</sup>* lines.**

A, 20 Days Post Anthesis (DPA) fruits. B, red ripe (RR) fruits. Left panel, *cus1* mutants. Right panel, *Pro35S:SICUS1<sup>RNAi</sup>* lines. WT, wild type. Mean values ( $\pm$  S.D.) are calculated from 9 independent measurements (3 fruits, 3 technical replicates each). Significant differences from the corresponding WT are indicated by asterisks (t-test; \*,  $p < 0.05$ ; \*\*,  $p < 0.01$ ; \*\*\*,  $p < 0.001$ )

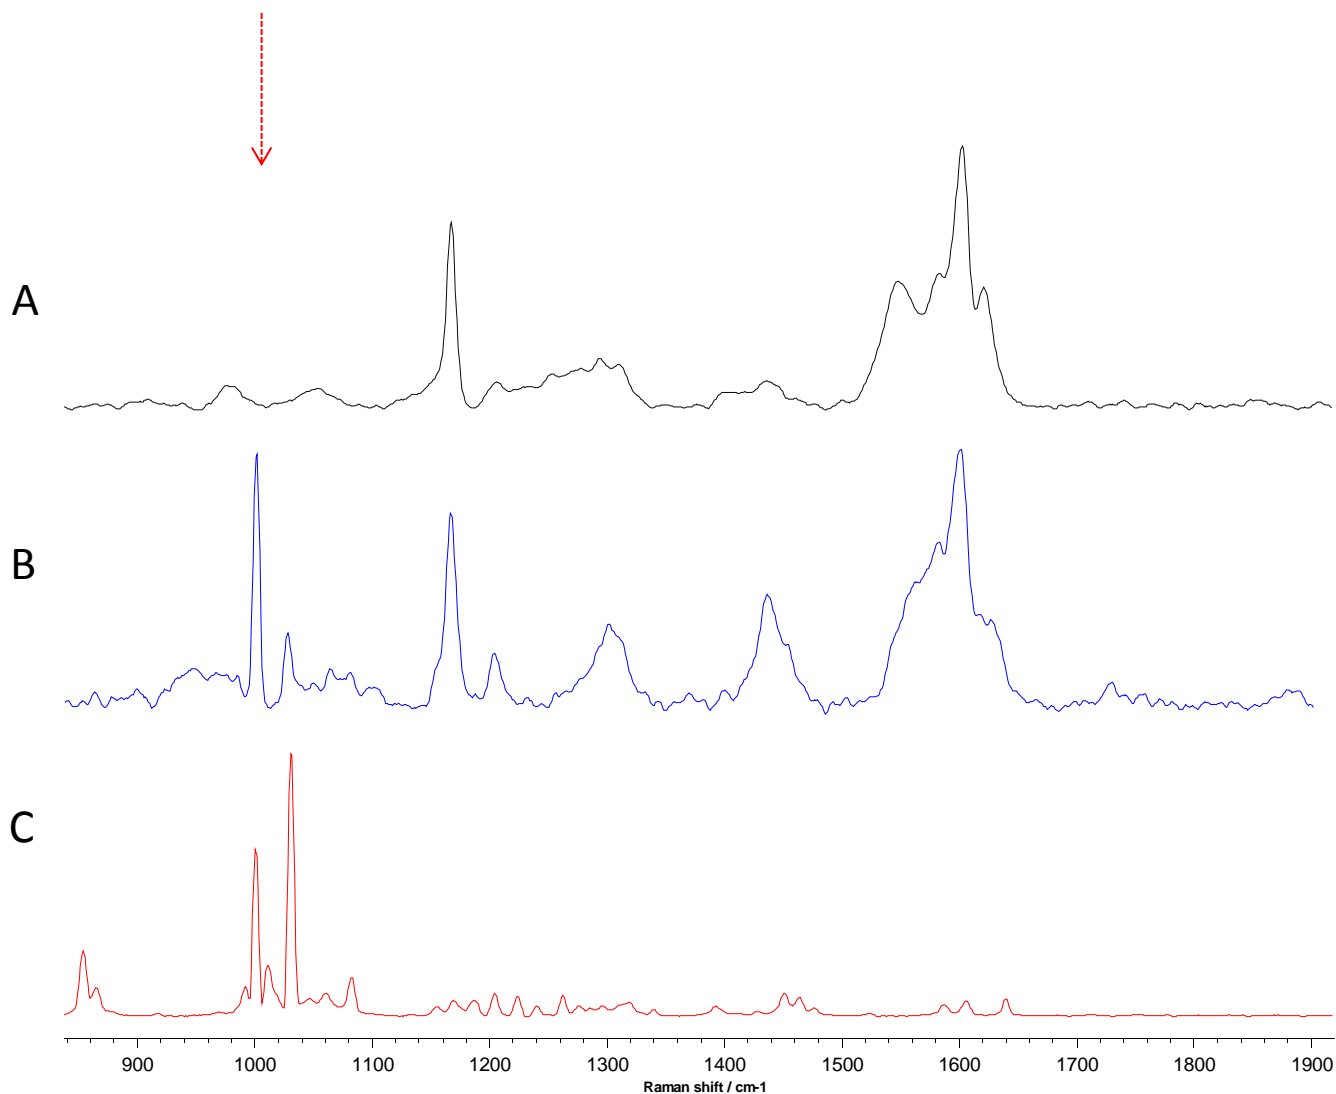

**Supplemental Figure 5.** Typical Raman spectra of non-alkylated (A) and alkylated (B) cutin and benzyloxymethylpyridinium triflate (BPT) reagent, (C) over the range 820 – 1900  $\text{cm}^{-1}$ . The spectrum of labelled cutin shows characteristic peak at 1002  $\text{cm}^{-1}$  (red arrow) that stand for BPT aromatic groups.
